# Supplementary material for: Silicon-Selenium Interplay Imparts Cadmium Resistance in Wheat through an Up-Regulating Antioxidant System
Source: MDPI journal article supplement (doi:10.3390/ijms25010387), 2023-12-27
Supplement: s1 [file s1]

## Supplementary data

Table S1: Composition of nutrient solution used in the experimental work.

| Salts                                                 | Molecular weight | Concentration in nutrient solution |
|-------------------------------------------------------|------------------|------------------------------------|
| $\text{Ca}(\text{NO}_3)_2 \cdot 4 \text{H}_2\text{O}$ | 236.15           | 2 mM                               |
| $\text{K}_2\text{SO}_4$                               | 174.27           | 1 mM                               |
| $\text{MgSO}_4 \cdot 7 \text{H}_2\text{O}$            | 246.48           | 0.5 mM                             |
| $\text{CaCl}_2 \cdot 2 \text{H}_2\text{O}$            | 147.02           | 2 mM                               |
| $\text{KH}_2\text{PO}_4$                              | 136.09           | 0.2 mM                             |
| Fe-EDTA                                               | 367.05           | 0.2 mM                             |
| $\text{H}_3\text{BO}_3$                               | 61.83            | 10 $\mu\text{M}$                   |
| $\text{MnSO}_4 \cdot \text{H}_2\text{O}$              | 169.02           | 2 $\mu\text{M}$                    |
| $\text{ZnSO}_4 \cdot 7\text{H}_2\text{O}$             | 287.55           | 0.5 $\mu\text{M}$                  |
| $\text{CuSO}_4 \cdot 5\text{H}_2\text{O}$             | 249.68           | 0.3 $\mu\text{M}$                  |
| $(\text{NH}_4)\text{Mo}_7\text{O}_{24}$               | 1235.86          | 0.01 $\mu\text{M}$                 |

Table S2: Effect of Se and Si on elemental composition of macro and micro elements for uptake in root and shoot of wheat under Cd stress. Data presented in the mean of 4 replicates $\pm$  standard error. A (\*) represents statistical difference at  $p>0.05$ .

| <b>Elemental composition►</b> | <b>Cd</b><br>(mg kg <sup>-1</sup> ) | <b>Se</b><br>(ug kg <sup>-1</sup> ) | <b>Si</b><br>(ug kg <sup>-1</sup> ) | <b>Zn</b><br>(mg kg <sup>-1</sup> ) | <b>Cu</b><br>(mg kg <sup>-1</sup> ) | <b>Mn</b><br>(mg kg <sup>-1</sup> ) | <b>Ca</b><br>(g kg <sup>-1</sup> ) | <b>Mg</b><br>(g kg <sup>-1</sup> ) | <b>P</b><br>(g kg <sup>-1</sup> ) | <b>S</b><br>(g kg <sup>-1</sup> ) | <b>Fe</b><br>(g kg <sup>-1</sup> ) | <b>Na</b><br>(g kg <sup>-1</sup> ) |
|-------------------------------|-------------------------------------|-------------------------------------|-------------------------------------|-------------------------------------|-------------------------------------|-------------------------------------|------------------------------------|------------------------------------|-----------------------------------|-----------------------------------|------------------------------------|------------------------------------|
| <b>Treatments▼</b>            | <b>Root</b>                         |                                     |                                     |                                     |                                     |                                     |                                    |                                    |                                   |                                   |                                    |                                    |
| <b>Control</b>                | 0.12 $\pm$ 0.0                      | 15.93 $\pm$ 1.0                     | 0.9 $\pm$ 0.2                       | *4.01 $\pm$ 0.4                     | 3.68 $\pm$ 0.3                      | 5.02 $\pm$ 1.0                      | 48.91 $\pm$ 11.4                   | *0.53 $\pm$ 0.1                    | 0.44 $\pm$ 0.1                    | *0.78 $\pm$ 0.1                   | 2376 $\pm$ 382                     | *1050 $\pm$ 66                     |
| <b>Se</b>                     | 0.09 $\pm$ 0.0                      | *72.06 $\pm$ 8.3                    | 0.8 $\pm$ 0.1                       | 3.41 $\pm$ 0.2                      | 3.09 $\pm$ 0.4                      | 6.31 $\pm$ 1.6                      | 49.38 $\pm$ 27.1                   | 0.39 $\pm$ 0.1                     | 0.50 $\pm$ 0.0                    | 0.76 $\pm$ 0.1                    | *3761 $\pm$ 570                    | 1002 $\pm$ 126                     |
| <b>Se+Si</b>                  | 0.71 $\pm$ 0.4                      | 55.95 $\pm$ 2.5                     | 1.8 $\pm$ 0.1                       | 2.90 $\pm$ 0.1                      | 4.71 $\pm$ 0.9                      | 5.17 $\pm$ 0.5                      | 18.04 $\pm$ 6.3                    | 0.43 $\pm$ 0.1                     | 0.47 $\pm$ 0.1                    | 0.67 $\pm$ 0.1                    | 2954 $\pm$ 257                     | 861 $\pm$ 194                      |
| <b>Cd</b>                     | *840.8 $\pm$ 55.3                   | 23.17 $\pm$ 0.6                     | 0.6 $\pm$ 0.1                       | 2.16 $\pm$ 0.2                      | 3.42 $\pm$ 0.5                      | 5.71 $\pm$ 1.0                      | 37.42 $\pm$ 7.5                    | 0.48 $\pm$ 0.1                     | 0.39 $\pm$ 0.1                    | 0.63 $\pm$ 0.0                    | 3494 $\pm$ 514                     | 978 $\pm$ 42.2                     |
| <b>Cd+Se</b>                  | 362.1 $\pm$ 47.0                    | 34.87 $\pm$ 4.2                     | 0.9 $\pm$ 0.1                       | 1.46 $\pm$ 0.1                      | 2.21 $\pm$ 0.3                      | 6.93 $\pm$ 1.3                      | 32.11 $\pm$ 4.1                    | 0.35 $\pm$ 0.1                     | 0.40 $\pm$ 0.0                    | 0.46 $\pm$ 0.0                    | 2512 $\pm$ 241                     | 389 $\pm$ 55                       |
| <b>Cd+Si</b>                  | 472.4 $\pm$ 17.3                    | 22.10 $\pm$ 1.5                     | 2.1 $\pm$ 0.3                       | 2.15 $\pm$ 0.1                      | *5.18 $\pm$ 0.8                     | *8.31 $\pm$ 1.3                     | 34.30 $\pm$ 7.2                    | 0.44 $\pm$ 0.1                     | 0.45 $\pm$ 0.0                    | 0.57 $\pm$ 0.0                    | 3246 $\pm$ 339                     | 710 $\pm$ 101                      |
| <b>Cd+Se+Si</b>               | 325.4 $\pm$ 31.3                    | 49.83 $\pm$ 5.4                     | *2.3 $\pm$ 0.1                      | 2.00 $\pm$ 0.1                      | 3.40 $\pm$ 0.7                      | 6.72 $\pm$ 1.0                      | 25.76 $\pm$ 3.6                    | 0.40 $\pm$ 0.1                     | *0.60 $\pm$ 0.1                   | 0.46 $\pm$ 0.1                    | 2858 $\pm$ 404                     | 641 $\pm$ 52                       |
|                               | <b>Shoot</b>                        |                                     |                                     |                                     |                                     |                                     |                                    |                                    |                                   |                                   |                                    |                                    |
| <b>Control</b>                | 0.02 $\pm$ 0.0                      | 7.65 $\pm$ 1.1                      | 0.5 $\pm$ 0.1                       | 3.20 $\pm$ 0.1                      | 1.05 $\pm$ 0.1                      | 9.37 $\pm$ 1.1                      | 0.96 $\pm$ 0.1                     | 0.26 $\pm$ 0.1                     | 0.40 $\pm$ 0.0                    | 0.49 $\pm$ 0.0                    | 15 $\pm$ 1.7                       | 22 $\pm$ 2.3                       |
| <b>Se</b>                     | 0.01 $\pm$ 0.0                      | *50.37 $\pm$ 10.1                   | 0.7 $\pm$ 0.1                       | *3.52 $\pm$ 0.5                     | 1.21 $\pm$ 0.2                      | 11.86 $\pm$ 1.8                     | 1.24 $\pm$ 0.2                     | 0.28 $\pm$ 0.1                     | 0.47 $\pm$ 0.1                    | 0.56 $\pm$ 0.1                    | 24 $\pm$ 4.0                       | 20 $\pm$ 2.8                       |
| <b>Se+Si</b>                  | 0.07 $\pm$ 0.0                      | 29.99 $\pm$ 0.9                     | 1.2 $\pm$ 0.2                       | 3.48 $\pm$ 0.4                      | 0.70 $\pm$ 0.1                      | 12.61 $\pm$ 1.2                     | 1.22 $\pm$ 0.1                     | 0.25 $\pm$ 0.1                     | 0.47 $\pm$ 0.1                    | 0.58 $\pm$ 0.1                    | 18 $\pm$ 0.9                       | 17 $\pm$ 1.8                       |
| <b>Cd</b>                     | *65.4 $\pm$ 4.6                     | 9.58 $\pm$ 1.9                      | 0.5 $\pm$ 0.1                       | 2.94 $\pm$ 0.2                      | 1.28 $\pm$ 0.1                      | 8.12 $\pm$ 0.5                      | 1.18 $\pm$ 0.1                     | 0.32 $\pm$ 0.1                     | 0.30 $\pm$ 0.1                    | 0.56 $\pm$ 0.1                    | *22 $\pm$ 2.0                      | 22 $\pm$ 1.3                       |
| <b>Cd+Se</b>                  | 47.0 $\pm$ 3.3                      | 29.47 $\pm$ 2.5                     | 0.5 $\pm$ 0.1                       | 3.47 $\pm$ 0.2                      | 0.90 $\pm$ 0.1                      | 12.05 $\pm$ 1.5                     | 1.26 $\pm$ 0.1                     | 0.29 $\pm$ 0.1                     | 0.45 $\pm$ 0.1                    | *0.65 $\pm$ 0.1                   | *22 $\pm$ 0.8                      | 18 $\pm$ 1.3                       |
| <b>Cd+Si</b>                  | 41.2 $\pm$ 6.3                      | 8.28 $\pm$ 1.2                      | *1.6 $\pm$ 0.2                      | 3.48 $\pm$ 0.3                      | 1.00 $\pm$ 0.2                      | *12.34 $\pm$ 1.7                    | 1.30 $\pm$ 0.2                     | 0.31 $\pm$ 0.1                     | 0.46 $\pm$ 0.1                    | 0.61 $\pm$ 0.1                    | 19 $\pm$ 2.5                       | 21 $\pm$ 33                        |
| <b>Cd+Se+Si</b>               | 30.9 $\pm$ 2.6                      | 25.42 $\pm$ 3.8                     | 1.4 $\pm$ 0.1                       | 2.47 $\pm$ 0.4                      | 0.70 $\pm$ 0.1                      | 8.60 $\pm$ 1.1                      | 0.86 $\pm$ 0.2                     | 0.19 $\pm$ 0.1                     | 0.41 $\pm$ 0.1                    | 0.42 $\pm$ 0.1                    | 13 $\pm$ 2.5                       | 14 $\pm$ 1.4                       |

Table S3: Input file of ionic composition in nutrients solution for possible chemical interaction study in Visual MINTEQ 3.1 .

| 0.2 Hoagland's Solution                                                             |        |    |                  |     |                 |                               |     |                 |                  |                                |       |        |        |                                |     |      |        |                                |                                |                  |
|-------------------------------------------------------------------------------------|--------|----|------------------|-----|-----------------|-------------------------------|-----|-----------------|------------------|--------------------------------|-------|--------|--------|--------------------------------|-----|------|--------|--------------------------------|--------------------------------|------------------|
| Stock Solution                                                                      | mM     | Ca | NO <sup>3-</sup> | K   | NH <sub>4</sub> | PO <sub>4</sub> <sup>-3</sup> | Mg  | SO <sub>4</sub> | Cl <sup>-1</sup> | H <sub>3</sub> BO <sub>3</sub> | Mn    | Cu     | Zn     | MoO <sub>4</sub> <sup>-2</sup> | Fe  | EDTA | Na     | SeO <sub>3</sub> <sup>-2</sup> | SiO <sub>3</sub> <sup>-2</sup> | Cd <sup>+2</sup> |
| Ca(NO <sub>3</sub> ) <sub>2</sub> · 4H <sub>2</sub> O                               | 2      | 2  | 4                |     |                 |                               |     |                 |                  |                                |       |        |        |                                |     |      |        |                                |                                |                  |
| K <sub>2</sub> SO <sub>4</sub>                                                      | 1      |    |                  | 1   |                 |                               |     | 0.5             |                  |                                |       |        |        |                                |     |      |        |                                |                                |                  |
| Mg(SO <sub>4</sub> ) · 7H <sub>2</sub> O                                            | 0.5    |    |                  |     |                 |                               | 0.5 | 0.5             |                  |                                |       |        |        |                                |     |      |        |                                |                                |                  |
| CaCl <sub>2</sub> .2H <sub>2</sub> O                                                | 2      | 2  |                  |     |                 |                               |     |                 | 4                |                                |       |        |        |                                |     |      |        |                                |                                |                  |
| KH <sub>2</sub> PO <sub>4</sub>                                                     | 0.2    |    |                  | 0.2 |                 | 0.2                           |     |                 |                  |                                |       |        |        |                                |     |      |        |                                |                                |                  |
| Fe-EDTA                                                                             | 0.2    |    |                  |     |                 |                               |     | 0.1             |                  |                                |       |        |        |                                | 0.2 | 0.2  |        |                                |                                |                  |
| H <sub>3</sub> BO <sub>3</sub>                                                      | 0.01   |    |                  |     |                 |                               |     |                 |                  | 0.01                           |       |        |        |                                |     |      |        |                                |                                |                  |
| MnSO <sub>4</sub> · H <sub>2</sub> O                                                | 0.0045 |    |                  |     |                 |                               |     | 0.002           |                  |                                | 0.002 |        |        |                                |     |      |        |                                |                                |                  |
| CuSO <sub>4</sub> · 5H <sub>2</sub> O                                               | 0.0003 |    |                  |     |                 |                               |     | 0.0003          |                  |                                |       | 0.0003 |        |                                |     |      |        |                                |                                |                  |
| ZnSO <sub>4</sub> · 7H <sub>2</sub> O                                               | 0.0015 |    |                  |     |                 |                               |     | 0.0005          |                  |                                |       |        | 0.0005 |                                |     |      |        |                                |                                |                  |
| (NH <sub>4</sub> ) <sub>6</sub> Mo <sub>7</sub> O <sub>24</sub> · 4H <sub>2</sub> O | 0.0001 |    |                  |     | 0.00001         |                               |     |                 |                  |                                |       |        |        | 0.00001                        |     |      |        |                                |                                |                  |
| Na <sub>2</sub> SeO <sub>3</sub>                                                    | 0.0015 |    |                  |     |                 |                               |     |                 |                  |                                |       |        |        |                                |     |      | 0.0032 | 0.0015                         |                                |                  |
| Na <sub>2</sub> SiO <sub>3</sub>                                                    | 0.002  |    |                  |     |                 |                               |     |                 |                  |                                |       |        |        |                                |     |      | 0.004  |                                | 0.002                          |                  |
| CdCl <sub>2</sub>                                                                   | 0.01   |    |                  |     |                 |                               |     |                 | 0.02             |                                |       |        |        |                                |     |      |        |                                |                                | 0.01             |
|                                                                                     | Pura   | 4  | 4                | 1.2 | 0.00001         | 0.2                           | 0.5 | 1.1028          | 4.02             | 0.01                           | 0.002 | 0.0003 | 0.0005 | 0.00001                        | 0.2 | 0.2  | 0.0072 | 0.0015                         | 0.002                          | 0.01             |

Table S4: Interaction of Si-Cd in nutrient solution.

| Treatments | % of total concentration | Species name                             |
|------------|--------------------------|------------------------------------------|
| Si         | 97.21                    | $\text{H}_4\text{SiO}_4$                 |
|            | 0.023                    | $\text{H}_4\text{SiO}_4\text{SO}_4^{-2}$ |
| Cd         | 2.766                    | $\text{H}_3\text{SiO}_4^-$               |
|            | 1.692                    | $\text{Cd}^{+2}$                         |
|            | 0.015                    | $\text{CdOH}^+$                          |
|            | 0.394                    | $\text{CdCl}^+$                          |
|            | 0.121                    | <b><math>\text{CdSO}_4</math> (aq)</b>   |
|            | 0.013                    | $\text{CdNO}_3^+$                        |
|            | 0.305                    | <b><math>\text{CdHPO}_4</math> (aq)</b>  |
|            | 97.451                   | $\text{CdEDTA}^{-2}$                     |
| Cd+Si      | 97.625                   | $\text{H}_4\text{SiO}_4$                 |
|            | 0.023                    | $\text{H}_4\text{SiO}_4\text{SO}_4^{-2}$ |
|            | 2.352                    | $\text{H}_3\text{SiO}_4^-$               |
|            | 1.853                    | $\text{Cd}^{+2}$                         |
|            | 0.015                    | $\text{CdOH}^+$                          |
|            | 0.429                    | $\text{CdCl}^+$                          |
|            | 0.132                    | <b><math>\text{CdSO}_4</math> (aq)</b>   |
|            | 0.014                    | $\text{CdNO}_3^+$                        |
|            | 0.336                    | <b><math>\text{CdHPO}_4</math> (aq)</b>  |
|            | 97.212                   | $\text{CdEDTA}^{-2}$                     |

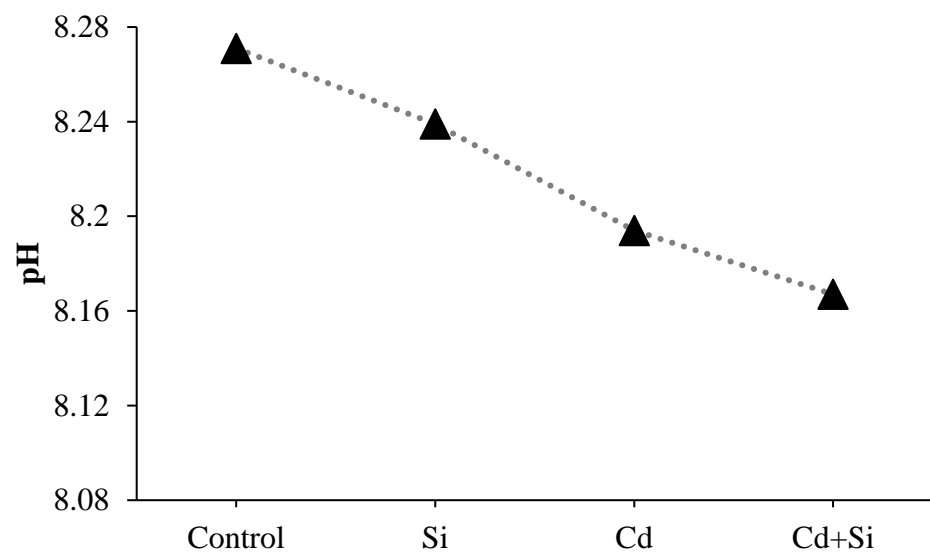

Figure S1: Effect of Si-Cd addition on pH change in nutrient solution inferred by visual MINTEQ 3.1
